# Supplementary material for: Selection and enrichment of microbial species with an increased lignocellulolytic phenotype from a native soil microbiome by activity-based probing
Source: PubMed Central journal article supplement (PMC10542759; doi:10.1038/s43705-023-00305-w), 2023-09-30
Supplement: 43705_2023_305_MOESM1_ESM.pdf [file 43705_2023_305_MOESM1_ESM.pdf]

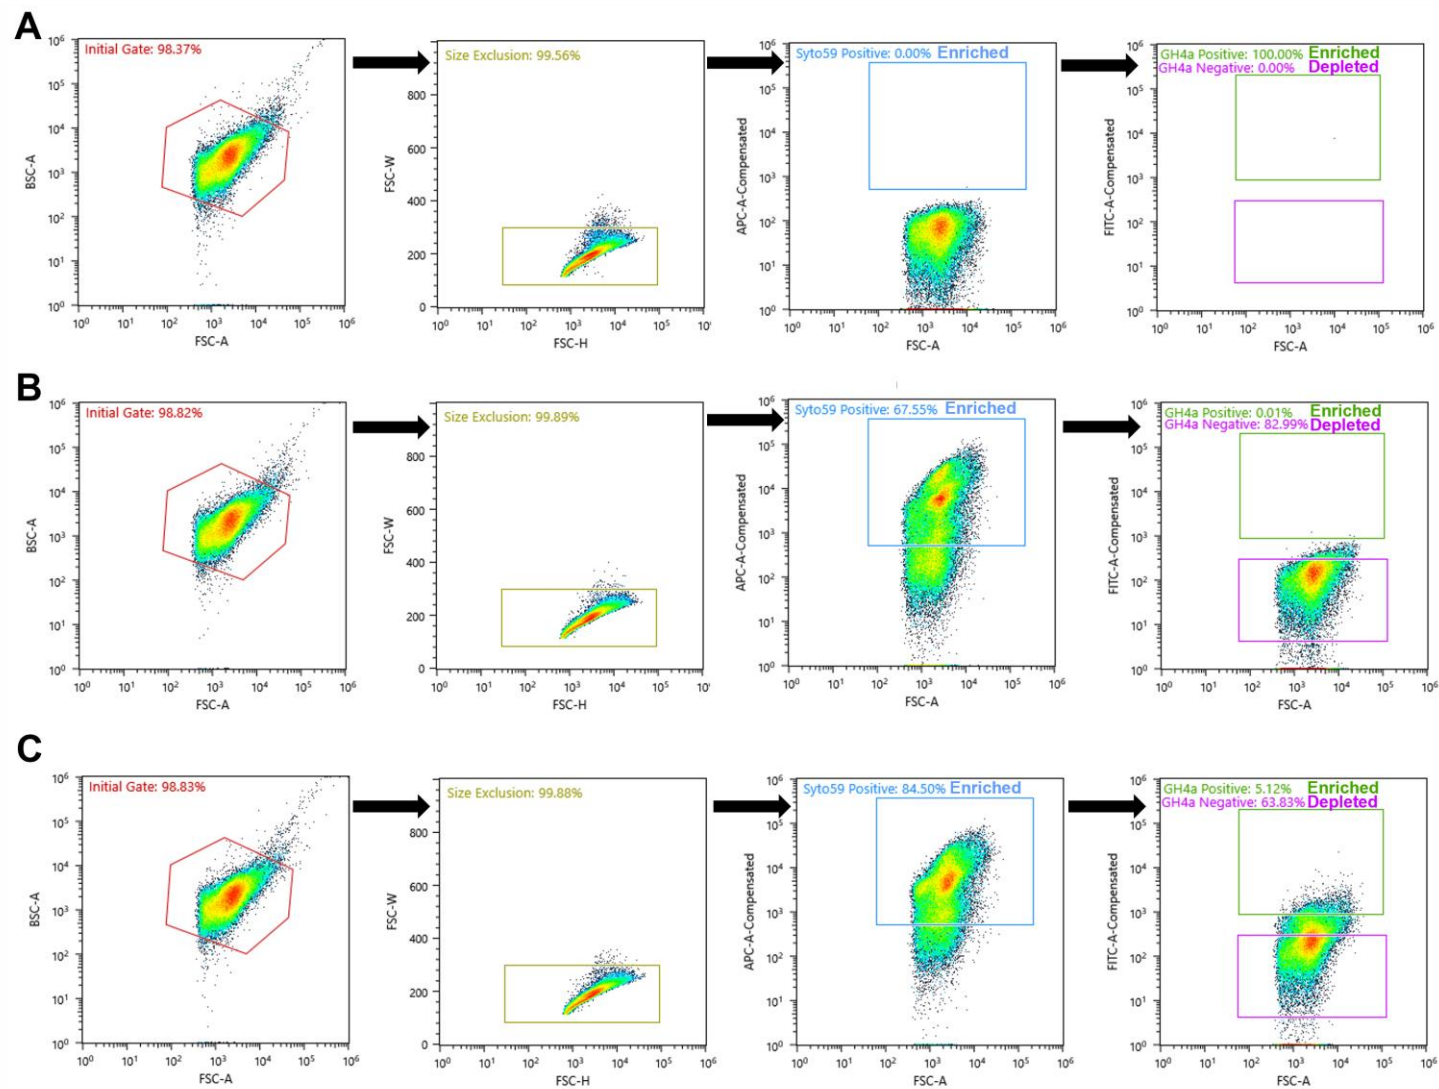

**SI Figure 1.** Sony SH800 sorter plots for sorting with GH4a activity-based probe. **(A)** Original set of sorter gates determined with an unlabeled control sample. **(B)** Sorter gates to determine biological events only containing the Syto59 signal. **(C)** Final sorter gates used to sort biological events containing signal from GH4a-ABP. Black arrows direction of nested plots.

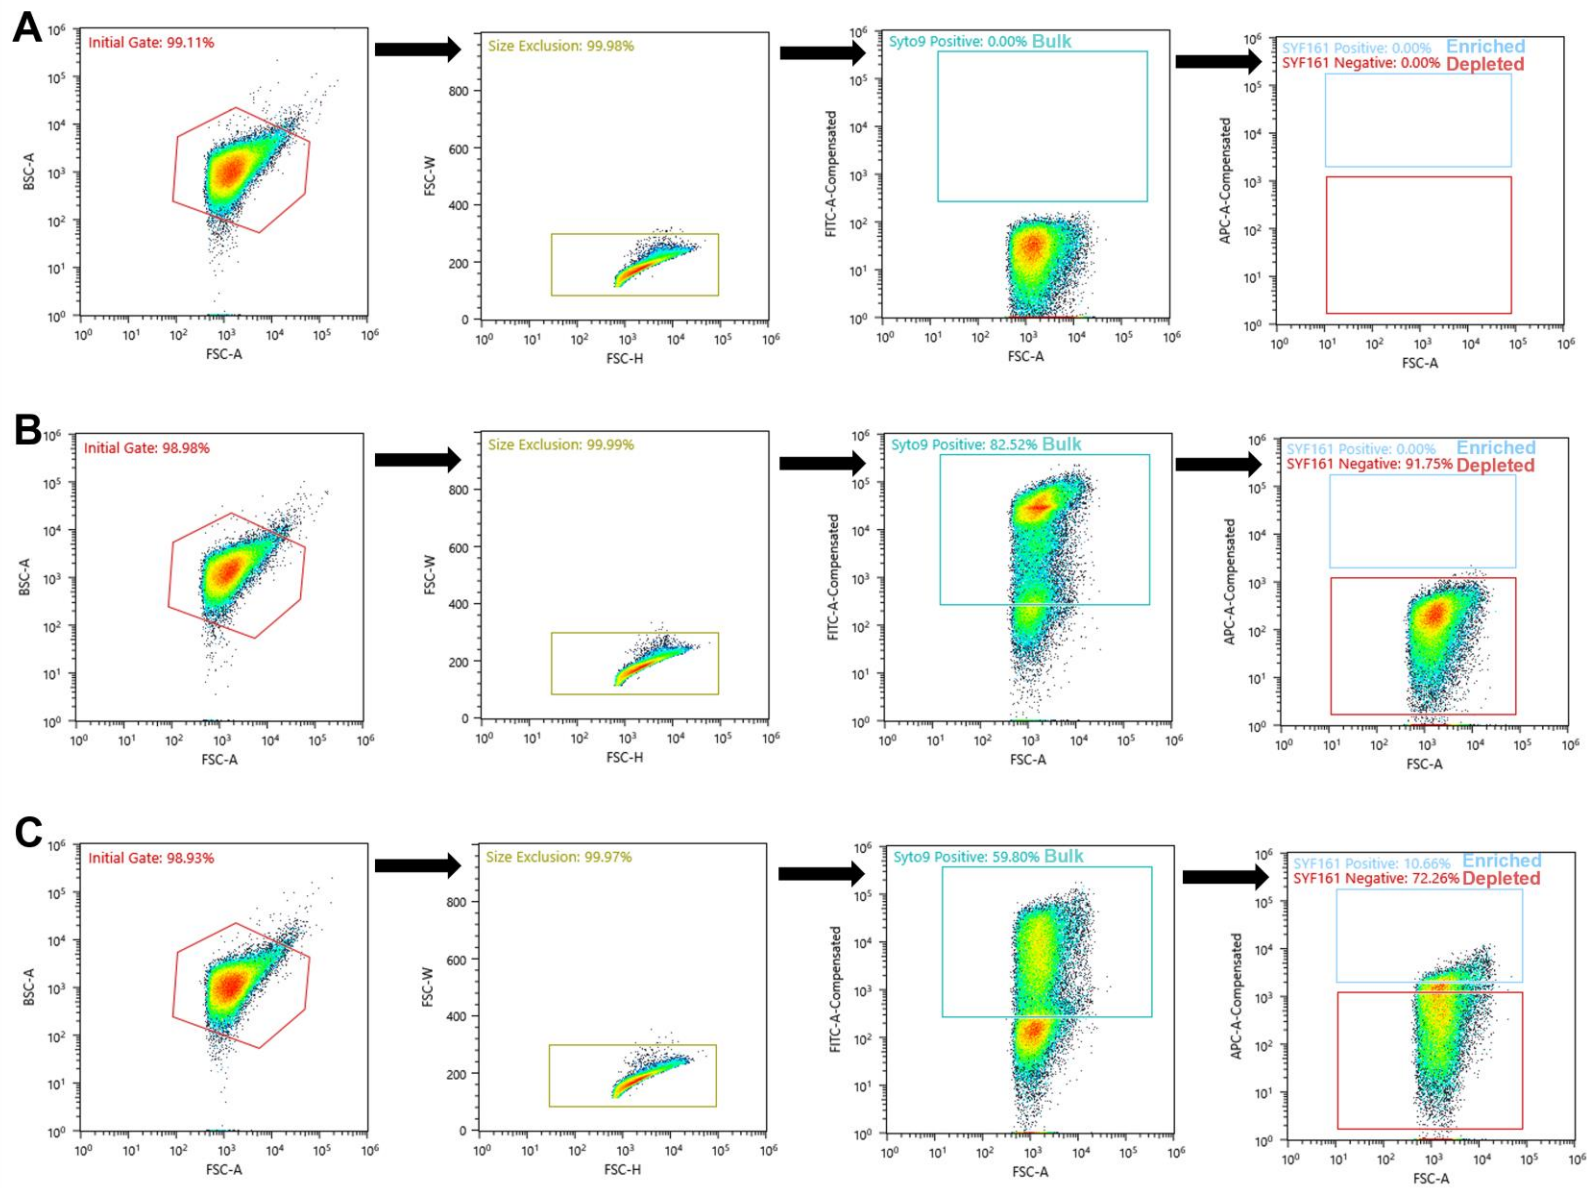

**SI Figure 2.** Sony SH800 sorter plots for sorting with SYF161 activity-based probe. **(A)** Original set of sorter gates determined with an unlabeled control sample. **(B)** Sorter gates to determine biological events only containing the Syto9 signal. **(C)** Final sorter gates used to sort biological events containing signal from SYF161-ABP. Black arrows direction of nested plots.

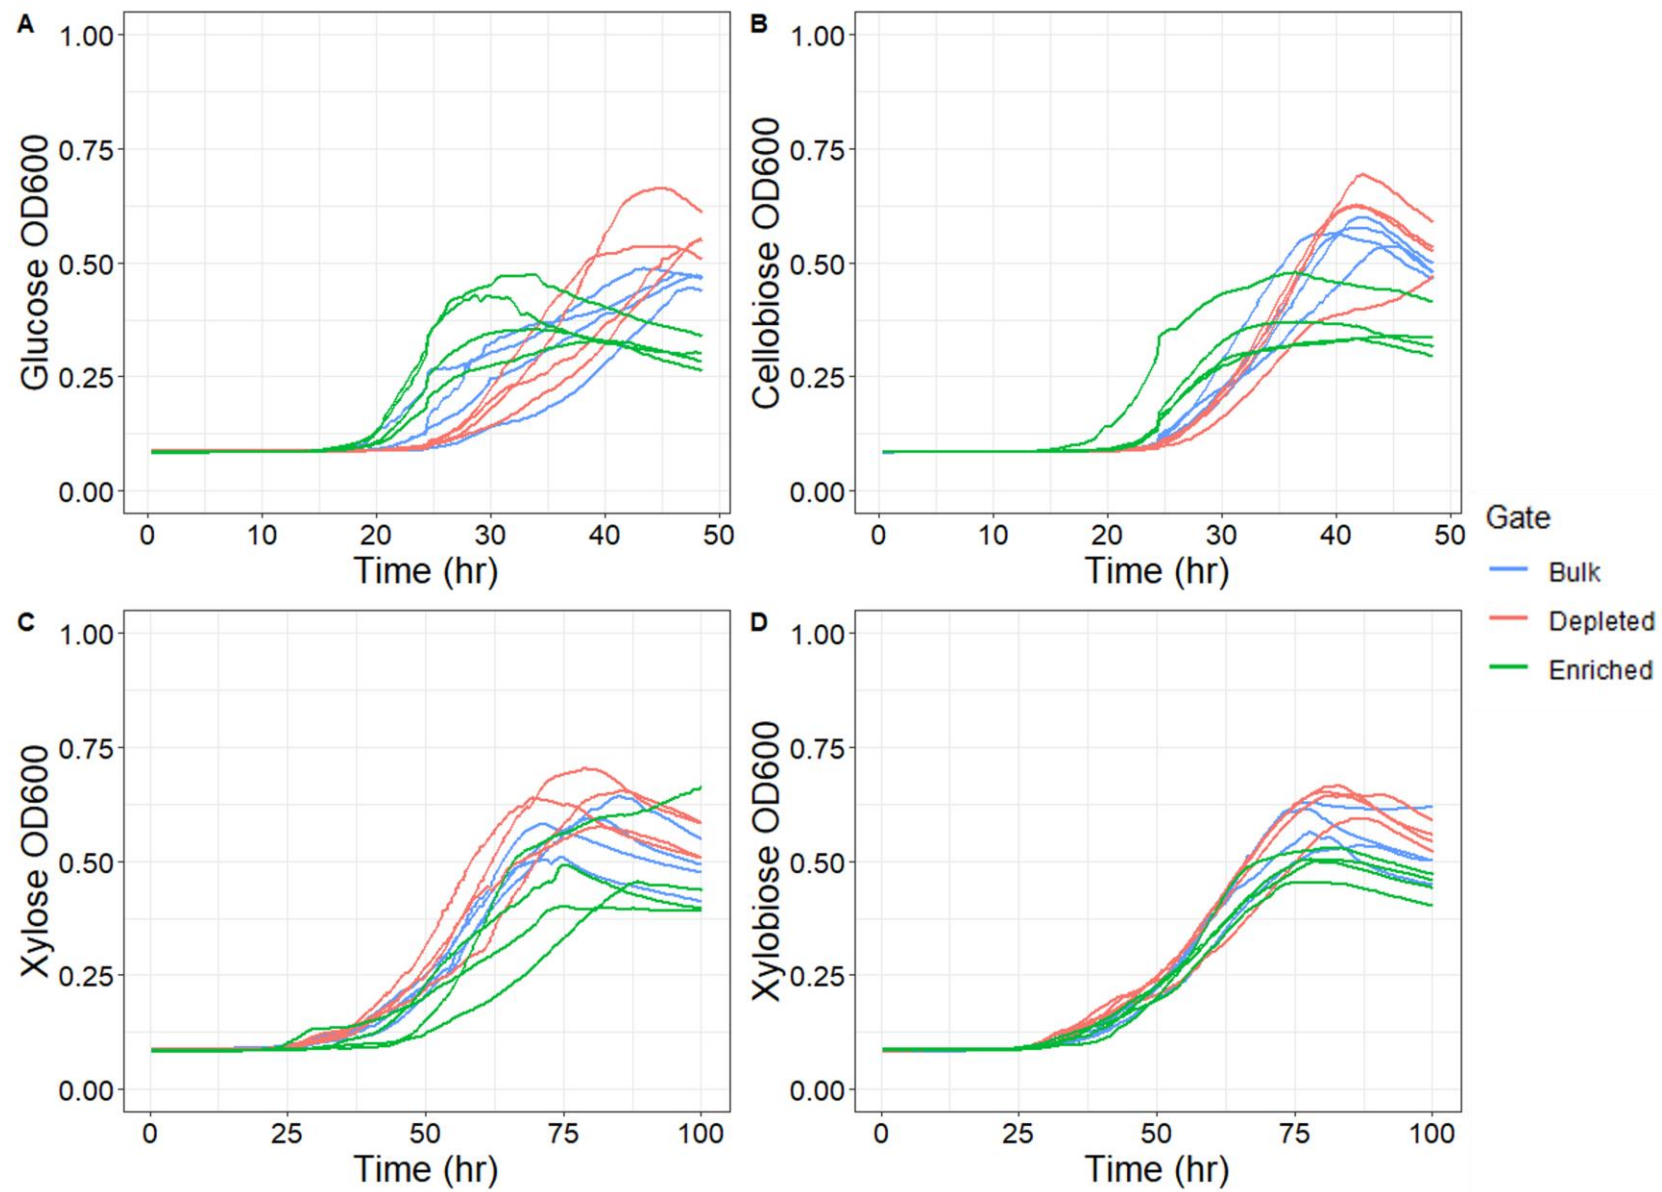

**SI Figure 3.** Optical density plots for the continuous plate reader assay (OD600). **(A)** GH4a sorted populations with glucose-MUB. **(B)** GH4a sorted populations with cellobiose-MUB. **(C)** SYF161 sorted populations with xylose-MUB. **(D)** SYF161 sorted populations with xylobiose-MUB.

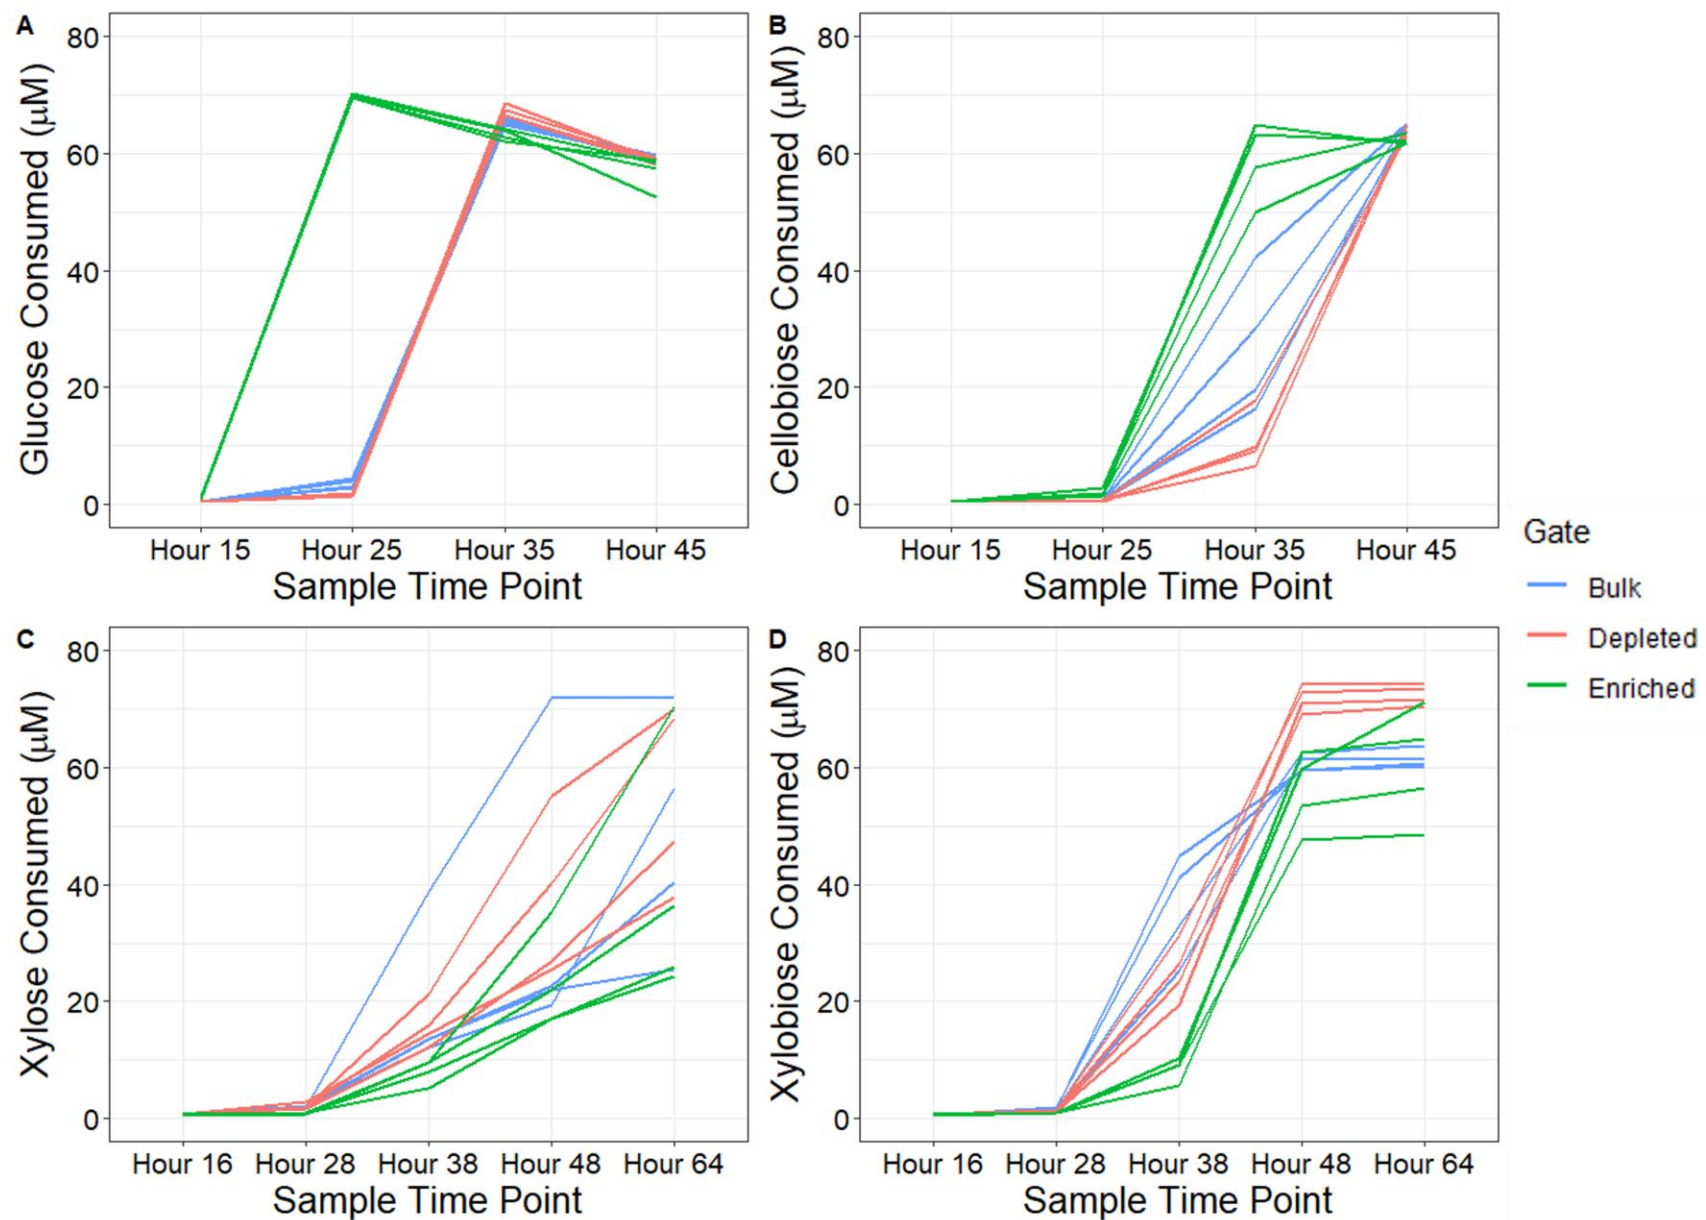

**SI Figure 4.** Discrete kinetic plots for substrate consumed ( $\mu\text{M}$ ) at distinct time points. **(A)** Glucose-MUB incubated samples that were sampled at 15, 25, 35, and 45-hours during the incubation. **(B)** Cellobiose-MUB incubated samples that were sampled at 15, 25, 35, and 45-hours during the incubation. **(C)** Xylose-MUB incubated samples that were sampled at 16, 28, 38, 48, and 64-hours during the incubation. **(D)** Xylobiose-MUB incubated samples that were sampled at 16, 28, 38, 48, and 64-hours during the incubation.

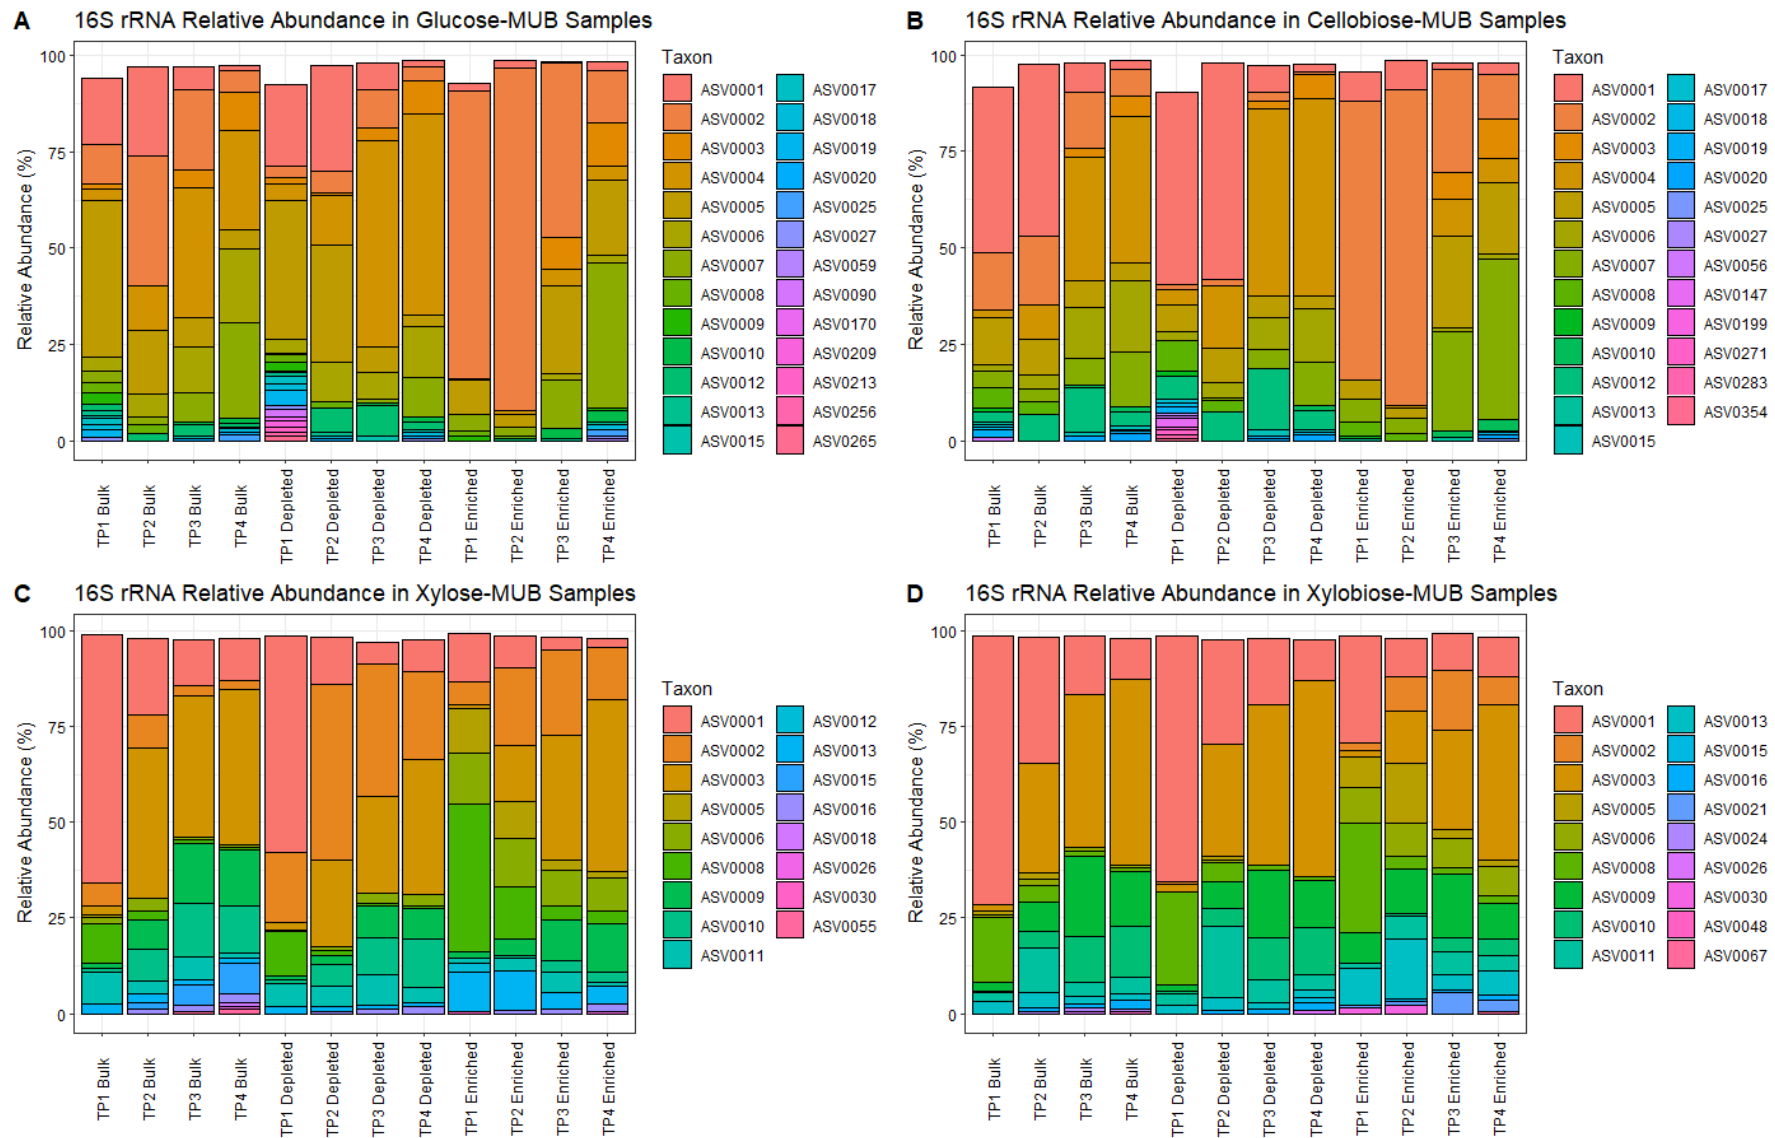

**SI Figure 5.** 16S rRNA gene relative abundances for averaged sorted incubations. Incubations from three sorter populations samples at four time points. Taxa represented as amplicon sequence variant (ASV) for taxa above 0.5 % relative abundance in the averaged samples. **(A)** Glucose-MUB incubated samples sampled at 15, 25, 35, and 45-hours during the incubation. **(B)** Cellobiose-MUB incubated samples that were sampled at 15, 25, 35, and 45-hours during the incubation. **(C)** Xylose-MUB incubated samples that were sampled at 16, 28, 38, 48, and 64-hours during the incubation. **(D)** Xylobiose-MUB incubated samples that were sampled at 16, 28, 38, 48, and 64-hours during the incubation.



**Supplementary Table 1. PERMANOVA analysis of relative abundance community composition for FACS incubated samples.** Pairwise comparison between sample types were compared by PERMANOVA using Bray Curtis dissimilarity with Holm p-value adjustment.

| Time point | Sample comparison   | Glucose |        |                  | Cellobiose |       |                  | Xylose  |       |                  | Xylobiose |       |                  |
|------------|---------------------|---------|--------|------------------|------------|-------|------------------|---------|-------|------------------|-----------|-------|------------------|
|            |                     | F Model | R2     | Adjusted p value | F Model    | R2    | Adjusted p value | F Model | R2    | Adjusted p value | F Model   | R2    | Adjusted p value |
| TP1        | Bulk v Depleted     | 1.57    | 0.0892 | 0.063            | 2.93       | 0.164 | 0.011            | 3.92    | 0.151 | 0.046            | 6.93      | 0.240 | 0.003            |
|            | Bulk v Enriched     | 72.48   | 0.801  | 0.003            | 41.96      | 0.688 | 0.003            | 71.07   | 0.764 | 0.003            | 90.69     | 0.805 | 0.003            |
|            | Enriched v Depleted | 36.60   | 0.696  | 0.003            | 52.99      | 0.768 | 0.003            | 48.18   | 0.687 | 0.003            | 57.28     | 0.723 | 0.003            |
| TP2        | Bulk v Depleted     | 28.65   | 0.566  | 0.003            | 18.21      | 0.453 | 0.003            | 13.32   | 0.377 | 0.006            | 2.48      | 0.101 | 0.071            |
|            | Bulk v Enriched     | 97.46   | 0.816  | 0.003            | 278.69     | 0.927 | 0.003            | 14.62   | 0.399 | 0.003            | 21.43     | 0.493 | 0.003            |
|            | Enriched v Depleted | 817.79  | 0.974  | 0.003            | 456.05     | 0.954 | 0.003            | 8.32    | 0.274 | 0.006            | 24.96     | 0.531 | 0.003            |
| TP3        | Bulk v Depleted     | 25.70   | 0.539  | 0.003            | 8.91       | 0.288 | 0.003            | 17.30   | 0.440 | 0.003            | 2.95      | 0.118 | 0.043            |
|            | Bulk v Enriched     | 59.95   | 0.732  | 0.003            | 18.86      | 0.462 | 0.003            | 13.87   | 0.387 | 0.003            | 9.54      | 0.303 | 0.003            |
|            | Enriched v Depleted | 159.68  | 0.879  | 0.003            | 36.18      | 0.622 | 0.003            | 4.95    | 0.184 | 0.019            | 10.25     | 0.318 | 0.003            |
| TP4        | Bulk v Depleted     | 25.82   | 0.540  | 0.003            | 3.24       | 0.134 | 0.03             | 8.79    | 0.305 | 0.006            | 0.85      | 0.037 | 0.463            |
|            | Bulk v Enriched     | 74.09   | 0.771  | 0.003            | 30.51      | 0.629 | 0.003            | 9.25    | 0.316 | 0.003            | 12.57     | 0.364 | 0.003            |
|            | Enriched v Depleted | 166.07  | 0.883  | 0.003            | 38.57      | 0.694 | 0.003            | 6.01    | 0.215 | 0.008            | 13.57     | 0.381 | 0.003            |
